# Supplementary material
Source: HighWire-hosted journal article supplement (https://bmjoncology.bmj.com/content/2/1/e000057)
Supplement: inline-supplementary-material-1 [file inline-supplementary-material-1.pdf]

**Appendix Material****Table A1 Screening visit result by ethnicity category****Table A2 Logistic regression of MRI positivity by age, ethnicity and IMD****Table A3 Logistic regression of PSA density by age, ethnicity and IMD****Table A4 Biopsy characteristics of cancers picked up after NHS evaluation**

**Table A1: Screening visit result by ethnicity category**

| <b>Broad Ethnicity Category</b> | <b>Screening MRI Positive<br/>N= 48</b> | <b>PSA Density Positive<br/>N= 16</b> | <b>Negative screening result<br/>N= 239</b> | <b>TOTAL N=303</b> |
|---------------------------------|-----------------------------------------|---------------------------------------|---------------------------------------------|--------------------|
| <b>White</b>                    | 43 (90%)                                | 12 (75%)                              | 204 (85%)                                   | 259 (85%)          |
| <b>Black</b>                    | 0 (0%)                                  | 3 (19%)                               | 10 (4%)                                     | 13 (5%)            |
| <b>Asian</b>                    | 2 (4%)                                  | 1 (6%)                                | 7 (3%)                                      | 10 (3%)            |
| <b>Other</b>                    | 3 (6%)                                  | 0 (0%)                                | 12 (5%)                                     | 15 (5%)            |
| <b>Not stated</b>               | 0 (0%)                                  | 0 (0%)                                | 6 (3%)                                      | 6 (2%)             |

Table A2: Logistic regression of positivity on MRI N= 48

| Variable                        | Screening MRI status N, Mean (SD) or % | OR (95% C.I.), p-value   |                           |
|---------------------------------|----------------------------------------|--------------------------|---------------------------|
|                                 |                                        | Univariable Model        | Multivariable Model       |
| <b>Age bands</b>                |                                        |                          |                           |
| 50-55 (N= 62 (20%))             | 2 (3%)                                 | 0.11 (0.02, 0.53), 0.005 | 0.12 (0.025, 0.55), 0.007 |
| 55-60 (N= 52 (17%))             | 3 (6%)                                 | 0.21 (0.06, 0.78), 0.019 | 0.20 (0.05, 0.76), 0.018  |
| 60-65 (N= 57 (19%))             | 13 (23%)                               | Reference                | Reference                 |
| 65-70 (N= 48 (16%))             | 10 (21%)                               | 0.89 (0.35, 2.26), 0.808 | 0.86 (0.33, 2.26), 0.763  |
| >70 (N= 50 (17%))               | 13 (26%)                               | 1.19 (0.49, 2.88), 0.701 | 1.08 (0.43, 2.70), 0.866  |
| Missing (N= 34 (11%))           | 7 (21%)                                | -                        | -                         |
| <b>Ethnicity</b>                |                                        |                          |                           |
| White (N= 259 (86%))            | 43 (17%)                               | Reference                | Reference                 |
| Black (N= 13 (4%))              | -                                      | -                        | -                         |
| Asian (N= 10 (3%))              | 2 (20%)                                | 1.26 (0.26, 6.12), 0.778 | 2.26 (0.38, 13.41), 0.370 |
| Other (N= 15 (5%))              | 3 (20%)                                | 1.26 (0.34, 4.64), 0.733 | 1.07 (0.21, 5.56), 0.933  |
| Not stated (N= 6 (2%))          | -                                      | -                        | -                         |
| <b>IMD score (N= 301 (99%))</b> | 48 (16%), 18.7 (10.7)                  | 0.99 (0.96, 1.02), 0.378 | 0.99 (0.96, 1.02), 0.518  |
| <b>Family history</b>           |                                        |                          |                           |
| No (N= 262 (87%))               | 41 (16%)                               | Reference                | Reference                 |
| Yes (N= 40 (13%))               | 7 (18%)                                | 1.14 (0.47, 2.76), 0.766 | 1.29 (0.47, 3.58), 0.624  |
| Missing (N= 1 (<1%))            | -                                      | -                        | -                         |

**Table A3: Logistic regression of positivity on PSA density alone N= 16**

| Variable                        | PSA density positive<br>N, Mean (SD) or % | OR (95% C.I.), p-value    |                           |
|---------------------------------|-------------------------------------------|---------------------------|---------------------------|
|                                 |                                           | Univariable Model         | Multivariable Model       |
| <b>Age bands</b>                |                                           |                           |                           |
| 50-55 (N= 62 (20%))             | 2 (3%)                                    | 0.60 (0.10, 2.72), 0.584  | 0.80 (0.12, 5.37), 0.822  |
| 55-60 (N= 52 (17%))             | 3 (6%)                                    | 1.10 (0.21, 5.72), 0.908  | 1.34 (0.23, 7.69), 0.745  |
| 60-65 (N= 57 (19%))             | 4 (7%)                                    | Reference                 | Reference                 |
| 65-70 (48 (16%))                | 4 (8%)                                    | 1.64 (0.35, 7.71), 0.533  | 2.02 (0.40, 10.33), 0.398 |
| >70 (N= 50 (17%))               | 1 (2%)                                    | 0.37 (0.04, 3.65), 0.393  | 0.54 (0.05, 5.85), 0.609  |
| Missing (N= 34 (11%))           | 3 (9%)                                    | -                         | -                         |
| <b>Ethnicity</b>                |                                           |                           |                           |
| White (N= 259 (86%))            | 12 (5%)                                   | Reference                 | Reference                 |
| Black (N= 13 (4%))              | 3 (2%)                                    | 6.18 (1.50, 25.40), 0.012 | 6.95 (1.39, 34.68), 0.018 |
| Asian (N= 10 (3%))              | 1 (10%)                                   | 2.29 (0.27, 19.55) 0.450  | <sup>-1</sup>             |
| Other (N= 15 (5%))              | -                                         | -                         | -                         |
| Not stated (N= 6 (2%))          | -                                         | -                         | -                         |
| <b>IMD score (N= 301 (99%))</b> | 16 (5%), 18.6 (12.2)                      | 0.99 (0.94, 1.03), 0.605  | 1.00 (0.95, 1.05), 0.893  |
| <b>Family history</b>           |                                           |                           |                           |
| 0 (N= 262 (87%))                | 16 (6%)                                   | Reference                 | Reference                 |
| 1 (N= 40 (13%))                 | -                                         | -                         | -                         |
| Missing (N= 1 (<1%))            | -                                         | -                         | -                         |

1: There is no OR for the Asian male as his age was missing so he was excluded from the multivariable model

**Table A4 Biopsy characteristics of cancers picked up after NHS evaluation**

| i. Characteristics of cancer cases (non-significant cancer highlighted in grey) which had a positive MRI at the screening visit – Any cancer: N= 27/48 (56%), Significant Cancer N= 25/48 (52%) |                       |                       |              |                                                        |      |             |
|-------------------------------------------------------------------------------------------------------------------------------------------------------------------------------------------------|-----------------------|-----------------------|--------------|--------------------------------------------------------|------|-------------|
| Index                                                                                                                                                                                           | Overall Gleason score | Maximal Gleason score | % pattern 4  | Maximum cancer core length (MCCL) across areas biopsed | PSA  | PSA density |
| 1                                                                                                                                                                                               | G3+3                  | G3+3                  |              | .5                                                     | 1.16 | 0.05        |
| 2                                                                                                                                                                                               | G3+3                  | G3+3                  |              | 2                                                      | 2.73 | 0.09        |
| 3                                                                                                                                                                                               | G3+4                  | G3+4                  | 10           | 12                                                     | .85  | 0.02        |
| 4                                                                                                                                                                                               | G3+4                  | G3+4                  | 10           | 3                                                      | .9   | 0.03        |
| 5                                                                                                                                                                                               | G3+4                  | G3+4                  | 5            | 8                                                      | 1.03 | 0.04        |
| 6                                                                                                                                                                                               | G3+4                  | G3+4                  | 10           | 8                                                      | 1.06 | 0.05        |
| 7                                                                                                                                                                                               | G3+4                  | G3+4                  | 10           | 5                                                      | 1.29 | 0.03        |
| 8                                                                                                                                                                                               | G3+4                  | G3+4                  | 10           | 3                                                      | 1.71 | 0.04        |
| 9                                                                                                                                                                                               | G3+4                  | G3+4                  | 20           | 10                                                     | 1.84 | 0.05        |
| 10                                                                                                                                                                                              | G3+4                  | G3+4                  | 20           | 7                                                      | 1.89 | 0.06        |
| 11                                                                                                                                                                                              | G3+4                  | G3+4                  | 20           | 8                                                      | 1.97 | 0.06        |
| 12                                                                                                                                                                                              | G3+4                  | G3+4                  | 10           | 6                                                      | 2.4  | 0.10        |
| 13                                                                                                                                                                                              | G3+4                  | G3+4                  | 10           | 6                                                      | 2.42 | 0.10        |
| 14                                                                                                                                                                                              | G3+4                  | G3+4                  | 10           | 6                                                      | 2.75 | 0.21        |
| 15                                                                                                                                                                                              | G3+4                  | G3+4                  | 20           | 10                                                     | 2.98 | 0.10        |
| 16                                                                                                                                                                                              | G3+4                  | G3+4                  | 10           | 4                                                      | 3.34 | 0.09        |
| 17                                                                                                                                                                                              | G3+4                  | G3+4                  | 10           | 2                                                      | 3.61 | 0.10        |
| 18                                                                                                                                                                                              | G3+4                  | G3+4                  | 10           | 5                                                      | 3.72 | 0.08        |
| 19                                                                                                                                                                                              | G3+4                  | G3+4                  | 30           | 6                                                      | 4.11 | 0.13        |
| 20                                                                                                                                                                                              | G3+4                  | G3+4                  | Not reported | 9                                                      | 5.33 | 0.15        |
| 21                                                                                                                                                                                              | G3+4                  | G3+4                  | 10           | 9                                                      | 5.68 | 0.16        |
| 22                                                                                                                                                                                              | G4+3                  | G4+3                  |              | 3                                                      | 1.   | 0.07        |
| 23                                                                                                                                                                                              | G4+3                  | G4+3                  |              | Not reported                                           | 4.12 | 0.21        |
| 24                                                                                                                                                                                              | G4+5                  | G4+5                  |              | 9                                                      | 2.04 | 0.23        |
| 25                                                                                                                                                                                              | G4+5                  | G4+5                  |              | 12                                                     | 4.97 | 0.18        |
| 26                                                                                                                                                                                              | G4+5                  | G4+5                  |              | 12                                                     | 7.53 | 0.33        |
| 27                                                                                                                                                                                              | G4+5                  | G4+5                  |              | 8                                                      | 43.5 | 0.75        |

| ii. Characteristics of cancer cases (non-significant cancer highlighted in grey) deemed as screen positive on PSA density – Any cancer: N= 5/16 (31%), Significant Cancer N= 4/16 (25%) |                       |                       |             |                                                        |      |             |
|-----------------------------------------------------------------------------------------------------------------------------------------------------------------------------------------|-----------------------|-----------------------|-------------|--------------------------------------------------------|------|-------------|
| Index                                                                                                                                                                                   | Overall Gleason score | Maximal Gleason score | % pattern 4 | Maximum cancer core length (MCCL) across areas biopsed | PSA  | PSA density |
| 1                                                                                                                                                                                       | G3+3                  | G3+3                  |             | 1                                                      | 2.98 | 0.12        |
| 2                                                                                                                                                                                       | G3+4                  | G3+4                  | 20          | 1                                                      | 3.79 | 0.13        |
| 3                                                                                                                                                                                       | G3+4                  | G3+4                  | 40          | 7                                                      | 9.22 | 0.26        |
| 4                                                                                                                                                                                       | G3+4                  | G3+4                  | 10          | 12                                                     | 10.5 | 0.23        |
| 5                                                                                                                                                                                       | G4+3                  | G4+3                  |             | 6                                                      | 6.42 | 0.27        |

| iii. Volume of MRI lesions for those cases who were referred for NHS assessment (non-significant cancer highlighted in grey, no cancer in blue and no biopsy performed in yellow) deemed as screen positive on MRI – Any cancer: N= 31/48 (65%), Significant Cancer N= 29/48 (60%) |                       |                    |                    |                    |
|------------------------------------------------------------------------------------------------------------------------------------------------------------------------------------------------------------------------------------------------------------------------------------|-----------------------|--------------------|--------------------|--------------------|
| Index                                                                                                                                                                                                                                                                              | Overall Gleason score | Volume of lesion 1 | Volume of lesion 2 | Volume of lesion 3 |
| 1                                                                                                                                                                                                                                                                                  | G3+3                  | 0.20               | 0.10               | 0.40               |
| 2                                                                                                                                                                                                                                                                                  | G3+3                  | 2.00               | .                  | .                  |
| 3                                                                                                                                                                                                                                                                                  | G3+3                  | 0.25               | .                  | .                  |
| 4                                                                                                                                                                                                                                                                                  | G3+4                  | 0.25               | .                  | .                  |
| 5                                                                                                                                                                                                                                                                                  | G3+4                  | 0.50               | .                  | .                  |
| 6                                                                                                                                                                                                                                                                                  | G3+4                  | 0.30               | .                  | .                  |
| 7                                                                                                                                                                                                                                                                                  | G3+4                  | 0.50               | 0.05               | .                  |
| 8                                                                                                                                                                                                                                                                                  | G3+4                  | 0.15               | .                  | .                  |
| 9                                                                                                                                                                                                                                                                                  | G3+4                  | 0.60               | 0.10               | .                  |
| 10                                                                                                                                                                                                                                                                                 | G3+4                  | 0.30               | .                  | .                  |
| 11                                                                                                                                                                                                                                                                                 | G3+4                  | 0.07               | 0.10               | .                  |
| 12                                                                                                                                                                                                                                                                                 | G3+4                  | 0.10               | 0.05               | .                  |
| 13                                                                                                                                                                                                                                                                                 | G3+4                  | 0.40               | 0.15               | .                  |
| 14                                                                                                                                                                                                                                                                                 | G3+4                  | 2.50               | .                  | .                  |
| 15                                                                                                                                                                                                                                                                                 | G3+4                  | 0.38               | 0.07               | .                  |
| 16                                                                                                                                                                                                                                                                                 | G3+4                  | 0.25               | .                  | .                  |
| 17                                                                                                                                                                                                                                                                                 | G3+4                  | 3.00               | .                  | .                  |
| 18                                                                                                                                                                                                                                                                                 | G3+4                  | 0.06               | 0.07               | .                  |
| 19                                                                                                                                                                                                                                                                                 | G3+4                  | 0.20               | 0.20               | .                  |
| 20                                                                                                                                                                                                                                                                                 | G3+4                  | 0.09               | 0.70               | .                  |
| 21                                                                                                                                                                                                                                                                                 | G3+4                  | 0.10               | .                  | .                  |
| 22                                                                                                                                                                                                                                                                                 | G3+4                  | 0.35               | .                  | .                  |
| 23                                                                                                                                                                                                                                                                                 | G3+4                  | 0.70               | .                  | .                  |
| 24                                                                                                                                                                                                                                                                                 | G3+4                  | 0.15               | .                  | .                  |
| 25                                                                                                                                                                                                                                                                                 | G3+4                  | 0.30               | .                  | .                  |
| 26                                                                                                                                                                                                                                                                                 | G4+3                  | 0.30               | 0.08               | .                  |
| 27                                                                                                                                                                                                                                                                                 | G4+3                  | 0.10               | 0.20               | .                  |
| 28                                                                                                                                                                                                                                                                                 | G4+5                  | 3.50               | .                  | .                  |
| 29                                                                                                                                                                                                                                                                                 | G4+5                  | 0.20               | .                  | .                  |
| 30                                                                                                                                                                                                                                                                                 | G4+5                  | 15.00              | .                  | .                  |
| 31                                                                                                                                                                                                                                                                                 | G4+5                  | 1.00               | 0.10               | .                  |
| 32                                                                                                                                                                                                                                                                                 | No cancer             | 0.50               | .                  | .                  |
| 33                                                                                                                                                                                                                                                                                 | No cancer             | 0.20               | .                  | .                  |
| 34                                                                                                                                                                                                                                                                                 | No cancer             | 0.90               | .                  | .                  |
| 35                                                                                                                                                                                                                                                                                 | No cancer             | 0.10               | .                  | .                  |
| 36                                                                                                                                                                                                                                                                                 | No biopsy performed   | 0.20               | .                  | .                  |
| 37                                                                                                                                                                                                                                                                                 | No biopsy performed   | 0.60               | .                  | .                  |
| 38                                                                                                                                                                                                                                                                                 | No biopsy performed   | 0.30               | .                  | .                  |
| 39                                                                                                                                                                                                                                                                                 | No biopsy performed   | 0.38               | .                  | .                  |
| 40                                                                                                                                                                                                                                                                                 | No biopsy performed   | 0.80               | .                  | .                  |
| 41                                                                                                                                                                                                                                                                                 | No biopsy performed   | 0.30               | .                  | .                  |
| 42                                                                                                                                                                                                                                                                                 | No biopsy performed   | 0.15               | 0.15               | .                  |

| iii. Volume of MRI lesions for those cases who were referred for NHS assessment (non-significant cancer highlighted in grey, no cancer in blue and no biopsy performed in yellow) deemed as screen positive on MRI – Any cancer: N= 31/48 (65%), Significant Cancer N= 29/48 (60%) |                       |                    |                    |                    |
|------------------------------------------------------------------------------------------------------------------------------------------------------------------------------------------------------------------------------------------------------------------------------------|-----------------------|--------------------|--------------------|--------------------|
| Index                                                                                                                                                                                                                                                                              | Overall Gleason score | Volume of lesion 1 | Volume of lesion 2 | Volume of lesion 3 |
| 43                                                                                                                                                                                                                                                                                 | No biopsy performed   | 0.20               | .                  | .                  |
| 44                                                                                                                                                                                                                                                                                 | No biopsy performed   | 0.52               | 0.03               | .                  |
| 45                                                                                                                                                                                                                                                                                 | No biopsy performed   | 0.50               | .                  | .                  |
| 46                                                                                                                                                                                                                                                                                 | No biopsy performed   | 0.10               | .                  | .                  |
| 47                                                                                                                                                                                                                                                                                 | No biopsy performed   | 0.15               | .                  | .                  |
| 48                                                                                                                                                                                                                                                                                 | No biopsy performed   | 0.20               | .                  | .                  |

| iv. MCCL of each area biopsied (non-significant cancer highlighted in grey, no cancer in blue) N= 37/64 (58%) |                       |                       |                       |                       |                       |              |
|---------------------------------------------------------------------------------------------------------------|-----------------------|-----------------------|-----------------------|-----------------------|-----------------------|--------------|
| Index                                                                                                         | Overall Gleason score | MCCL of biopsy area 1 | MCCL of biopsy area 2 | MCCL of biopsy area 3 | MCCL of biopsy area 4 | Maximum MCCL |
| 1                                                                                                             | G3+3                  | .                     | 0.50                  | .                     | .                     | 0.50         |
| 2                                                                                                             | G3+3                  | 1.00                  | .                     | .                     | .                     | 1.00         |
| 3                                                                                                             | G3+3                  | .                     | 1.00                  | 2.00                  | .                     | 2.00         |
| 4                                                                                                             | G3+4                  | 7.00                  | .                     | .                     | .                     | 7.00         |
| 5                                                                                                             | G3+4                  | 6.00                  | 0.50                  | .                     | .                     | 6.00         |
| 6                                                                                                             | G3+4                  | 5.00                  | .                     | .                     | 3.00                  | 5.00         |
| 7                                                                                                             | G3+4                  | 9.00                  | 1.50                  | 8.00                  | .                     | 9.00         |
| 8                                                                                                             | G3+4                  | 7.00                  | .                     | .                     | .                     | 7.00         |
| 9                                                                                                             | G3+4                  | 1.00                  | 2.00                  | .                     | .                     | 2.00         |
| 10                                                                                                            | G3+4                  | 6.00                  | 4.00                  | .                     | .                     | 6.00         |
| 11                                                                                                            | G3+4                  | .                     | 1.00                  | .                     | .                     | 1.00         |
| 12                                                                                                            | G3+4                  | 10.00                 | .                     | 1.00                  | .                     | 10.00        |
| 13                                                                                                            | G3+4                  | 6.00                  | 2.00                  | .                     | .                     | 6.00         |
| 14                                                                                                            | G3+4                  | 3.00                  | .                     | .                     | .                     | 3.00         |
| 15                                                                                                            | G3+4                  | 6.00                  | .                     | .                     | .                     | 6.00         |
| 16                                                                                                            | G3+4                  | 8.00                  | .                     | .                     | .                     | 8.00         |
| 17                                                                                                            | G3+4                  | 5.00                  | 5.00                  | .                     | .                     | 5.00         |
| 18                                                                                                            | G3+4                  | 12.00                 | .                     | .                     | .                     | 12.00        |
| 19                                                                                                            | G3+4                  | 12.00                 | .                     | .                     | .                     | 12.00        |
| 20                                                                                                            | G3+4                  | 9.00                  | .                     | .                     | .                     | 9.00         |
| 21                                                                                                            | G3+4                  | 4.00                  | .                     | .                     | .                     | 4.00         |
| 22                                                                                                            | G3+4                  | 6.00                  | .                     | .                     | .                     | 6.00         |
| 23                                                                                                            | G3+4                  | 10.00                 | .                     | .                     | .                     | 10.00        |
| 24                                                                                                            | G3+4                  | 3.00                  | .                     | .                     | .                     | 3.00         |
| 25                                                                                                            | G3+4                  | 8.00                  | 5.00                  | .                     | .                     | 8.00         |
| 26                                                                                                            | G3+4                  | 8.00                  | .                     | .                     | .                     | 8.00         |
| 27                                                                                                            | G4+3                  | .                     | .                     | .                     | .                     | .            |
| 28                                                                                                            | G4+3                  | .                     | 3.00                  | .                     | .                     | 3.00         |
| 29                                                                                                            | G4+5                  | 12.00                 | 1.00                  | .                     | .                     | 12.00        |
| 30                                                                                                            | G4+5                  | 8.00                  | .                     | 1.00                  | .                     | 8.00         |
| 31                                                                                                            | G4+5                  | 12.00                 | .                     | .                     | .                     | 12.00        |



| iv. MCCL of each area biopsied (non-significant cancer highlighted in grey, no cancer in blue) N= 37/64 (58%) |                       |                       |                       |                       |                       |              |
|---------------------------------------------------------------------------------------------------------------|-----------------------|-----------------------|-----------------------|-----------------------|-----------------------|--------------|
| Index                                                                                                         | Overall Gleason score | MCCL of biopsy area 1 | MCCL of biopsy area 2 | MCCL of biopsy area 3 | MCCL of biopsy area 4 | Maximum MCCL |
| 32                                                                                                            | G4+5                  | 9.00                  | .                     | .                     | .                     | 9.00         |
| 33                                                                                                            | No cancer             | .                     | .                     | .                     | .                     | .            |
| 34                                                                                                            | No cancer             | .                     | .                     | .                     | .                     | .            |
| 35                                                                                                            | No cancer             | .                     | .                     | .                     | .                     | .            |
| 36                                                                                                            | No cancer             | .                     | .                     | .                     | .                     | .            |
| 37                                                                                                            | No cancer             | .                     | .                     | .                     | .                     | .            |
